# Supplementary material for: Steroid Biomarkers Revisited – Improved Source Identification of Faecal Remains in Archaeological Soil Material
Source: PubMed Central journal article supplement (PMC5217961; doi:10.1371/journal.pone.0164882), 2017-01-06
Supplement: pone.0164882.s002.pdf [file pone.0164882.s002.pdf]

## Supporting Information

“Steroid Biomarkers Revisited – Improved Source Identification of Faecal Remains in Archaeological Soil Material”

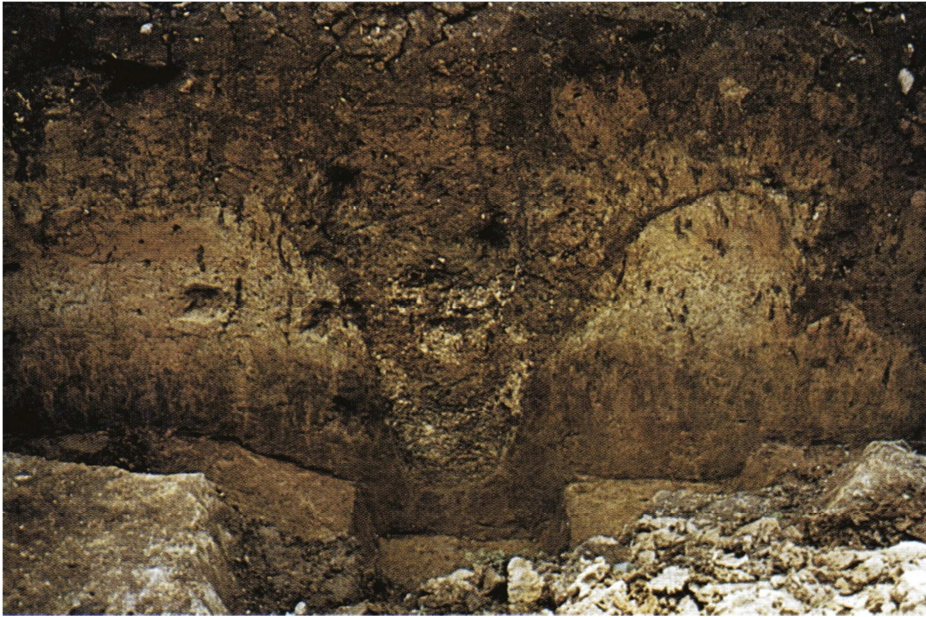

**S2 Fig. Stable drain from horse stables at the site Dormagen;** photo LVR-LandesMuseum Bonn/LVR-Amt für Bodendenkmalpflege im Rheinland, from Müller et al. (1979) 49 fig. 26. Permission for publication obtained from the LVR-LandesMuseum Bonn/LVR-Amt für Bodendenkmalpflege im Rheinland.
