# Supplementary material for: Steroid Biomarkers Revisited – Improved Source Identification of Faecal Remains in Archaeological Soil Material
Source: PubMed Central journal article supplement (PMC5217961; doi:10.1371/journal.pone.0164882), 2017-01-06
Supplement: pone.0164882.s005.pdf [file pone.0164882.s005.pdf]

## Supporting Information

“Steroid Biomarkers Revisited – Improved Source Identification of Faecal Remains in Archaeological Soil Material”

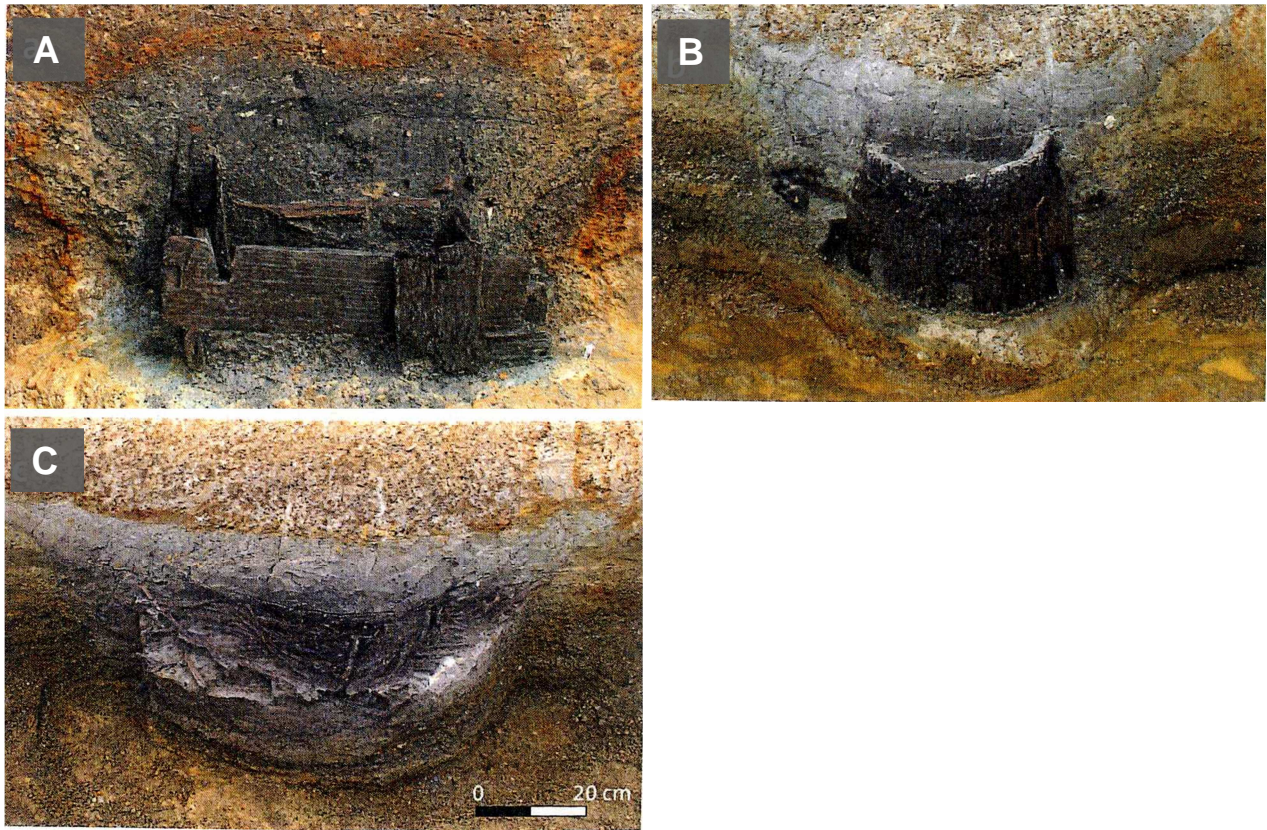

**S5 Fig. Site Düren-Arnoldsweiler:** well with box-shaped wooden lining (Linearbandkeramik; A), tree-trunk well (Bronze Age /Urnfild Period; B), Roman water hole with wickerwork revetment (C); photos LVR-Amt für Bodendenkmalpflege im Rheinland/Martin Wurzel Archäologie und Umwelttechnik GmbH, Stahnsdorf; from Gerlach et al., 2011. Permission for publication obtained from the LVR-LandesMuseum Bonn/LVR-Amt für Bodendenkmalpflege im Rheinland.
