# Supplementary material for: Steroid Biomarkers Revisited – Improved Source Identification of Faecal Remains in Archaeological Soil Material
Source: PubMed Central journal article supplement (PMC5217961; doi:10.1371/journal.pone.0164882), 2017-01-06
Supplement: pone.0164882.s006.pdf [file pone.0164882.s006.pdf]

## Supporting Information

“Steroid Biomarkers Revisited – Improved Source Identification of Faecal Remains in Archaeological Soil Material”

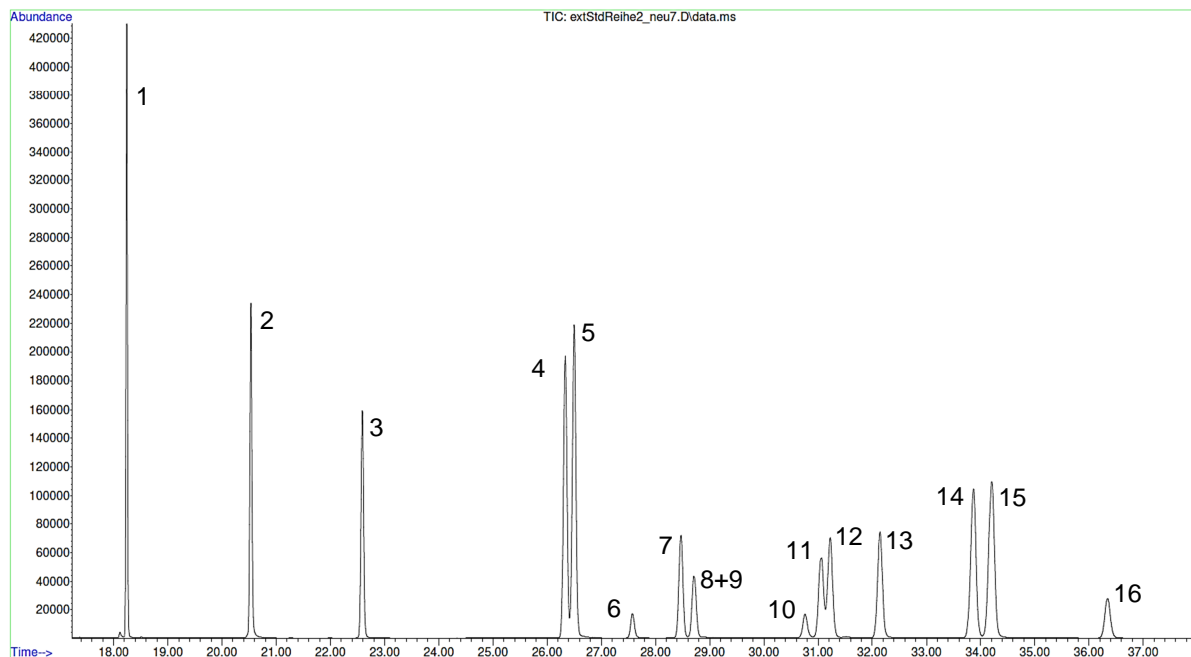

**S6 Fig. Chromatogram of the  $\Delta^5$ -sterol, stanol and stanone standard solution.**

1 = Desoxypregnanolone (IS 1), 2 = Pregnanolone (IS 1), 3 =  $5\alpha$ -Cholestane (IS 2), 4 = Coprostanol, 5 = Epicoprostanol, 6 = Cholestanone, 7 = Cholesterol, 8 =  $5\alpha$ -Cholestanol, 9 = Coprostanone, 10 = 4-Cholesten-3-one, 11 =  $5\beta$ -Stigmastanol, 12 = Epi- $5\beta$ -Stigmastanol, 13 = Stigmasterol, 14 =  $\beta$ -Sitosterol, 15 =  $5\alpha$ -Stigmastanol, 16 = 6-Ketocholestanol
