# Supplementary material for: Steroid Biomarkers Revisited – Improved Source Identification of Faecal Remains in Archaeological Soil Material
Source: PubMed Central journal article supplement (PMC5217961; doi:10.1371/journal.pone.0164882), 2017-01-06
Supplement: pone.0164882.s007.pdf [file pone.0164882.s007.pdf]

## Supporting Information

“Steroid Biomarkers Revisited – Improved Source Identification of Faecal Remains in Archaeological Soil Material”

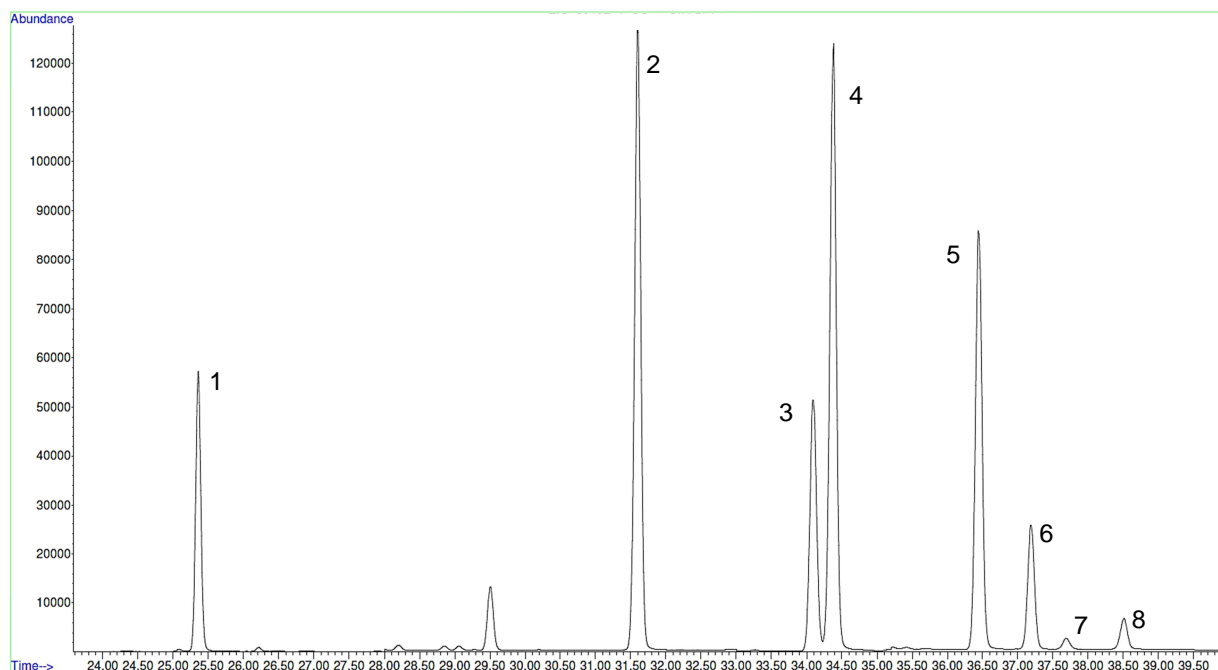

**S7 Fig. Chromatogram of the bile acid standard solution.**

1 = 5 $\alpha$ -Cholestane (IS 2), 2 = Isodeoxycholic acid (IS 1), 3 = Isolithocholic acid, 4 = Lithocholic acid  
5 = Deoxycholic acid, 6 = Chenodeoxycholic acid, 7 = Hyodeoxycholic acid, 8 = Ursodeoxycholic acid
