# Supplementary material for: Steroid Biomarkers Revisited – Improved Source Identification of Faecal Remains in Archaeological Soil Material
Source: PubMed Central journal article supplement (PMC5217961; doi:10.1371/journal.pone.0164882), 2017-01-06
Supplement: pone.0164882.s014.pdf [file pone.0164882.s014.pdf]

## Supporting Information

“Steroid Biomarkers Revisited – Improved Source Identification of Faecal Remains in Archaeological Soil Material”

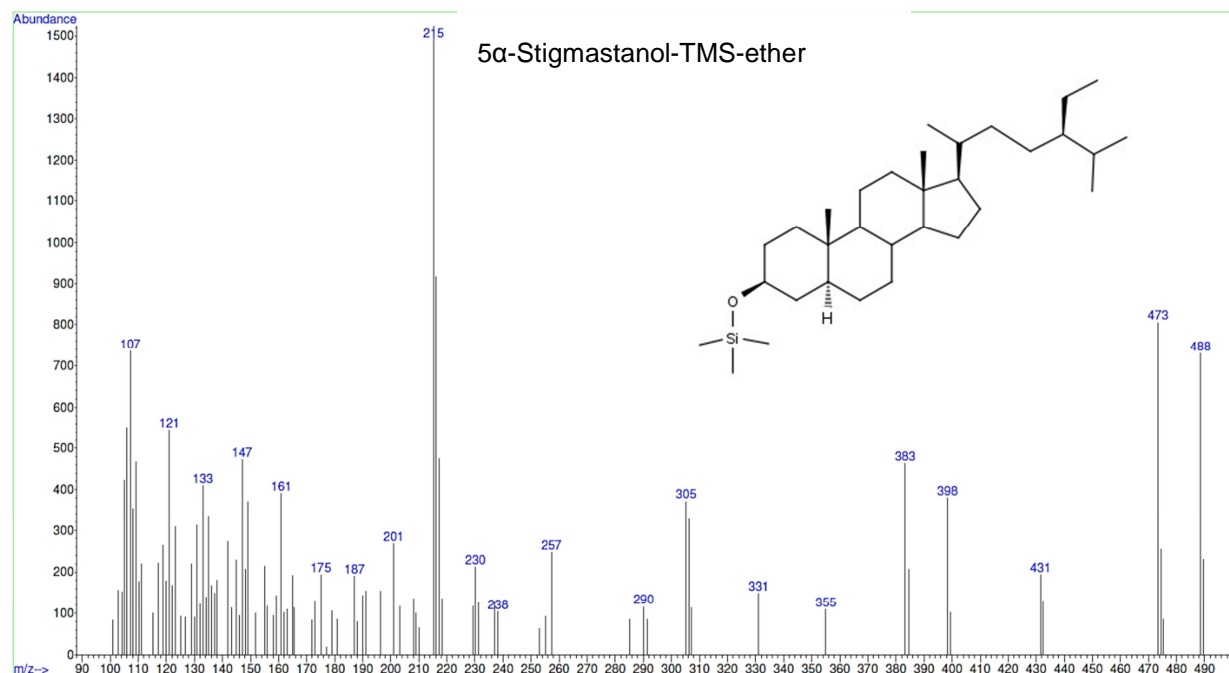

**S14 Fig.** Mass spectrum and structural formula of 5 $\alpha$ -stigmastanol trimethylsilyl ether.
