# Supplementary material for: Steroid Biomarkers Revisited – Improved Source Identification of Faecal Remains in Archaeological Soil Material
Source: PubMed Central journal article supplement (PMC5217961; doi:10.1371/journal.pone.0164882), 2017-01-06
Supplement: pone.0164882.s027.pdf [file pone.0164882.s027.pdf]

## Supporting Information

### “Steroid Biomarkers Revisited – Improved Source Identification of Faecal Remains in Archaeological Soil Material”

**S1 Table. Studies on steroid contents of animal or human faecal matter. Methods for quantification and analysed steroids.**

| Reference            | GC analysis and quantification                                                                                                                                                                                            | Studied steroids                                   |                                                      |                                        |                                               |              | Bile acids                                                                                                   |
|----------------------|---------------------------------------------------------------------------------------------------------------------------------------------------------------------------------------------------------------------------|----------------------------------------------------|------------------------------------------------------|----------------------------------------|-----------------------------------------------|--------------|--------------------------------------------------------------------------------------------------------------|
|                      |                                                                                                                                                                                                                           | $\Delta^5$ -Sterols                                | 5 $\alpha$ -Stanols                                  | 5 $\beta$ -Stanols                     | Epi-5 $\beta$ -Stanols                        | Stanones     |                                                                                                              |
| Batta et al., 2002   | Calibration curves from standard solutions and internal standard; GC-FID                                                                                                                                                  |                                                    |                                                      |                                        |                                               |              | lithocholic acid<br>isodeoxycholic acid<br>deoxycholic acid<br>chenodeoxycholic acid<br>ursodeoxycholic acid |
| Derrien et al., 2011 | Calibration curves from standard solutions (5 $\beta$ -stigmastanol, epi-5 $\beta$ -stigmastanol, and 5 $\alpha$ -stigmastanol were quantified with the calibration curve of coprostanol); GC-MS: selected ion monitoring | cholesterol<br>stigmasterol<br>$\beta$ -sitosterol | 5 $\alpha$ -cholestanol<br>5 $\alpha$ -stigmastanol  | coprostanol<br>5 $\beta$ -stigmastanol | epicoprostanol<br>epi-5 $\beta$ -stigmastanol |              |                                                                                                              |
| Eneroth et al., 1964 | Calibration curves from standard solutions                                                                                                                                                                                | cholesterol<br>$\beta$ -sitosterol                 |                                                      | coprostanol<br>5 $\beta$ -stigmastanol |                                               | coprostanone |                                                                                                              |
| Gill et al., 2010    | No information provided                                                                                                                                                                                                   | cholesterol<br>stigmasterol<br>$\beta$ -sitosterol | 5 $\alpha$ -cholestanol<br>5 $\alpha$ -stigmastanol  | coprostanol<br>5 $\beta$ -stigmastanol | epicoprostanol<br>epi-5 $\beta$ -stigmastanol |              |                                                                                                              |
| Leeming et al., 1996 | No information provided (Scan)                                                                                                                                                                                            | cholesterol<br>stigmasterol<br>$\beta$ -sitosterol | 5 $\alpha$ -cholestanol,<br>5 $\alpha$ -stigmastanol | coprostanol<br>5 $\beta$ -stigmastanol | epicoprostanol<br>epi-5 $\beta$ -stigmastanol | coprostanone |                                                                                                              |
| Isobe et al., 2002   | Calibration curves from standard solutions; GC-MS measurement in selected ion monitoring                                                                                                                                  | cholesterol<br>stigmasterol<br>$\beta$ -sitosterol | 5 $\alpha$ -cholestanol<br>5 $\alpha$ -stigmastanol  | coprostanol                            | epicoprostanol                                | coprostanone |                                                                                                              |
| Reddy et al., 1998   | Comparison of compound peak areas to peak area of internal standard of known concentration (androst-4-en-3,17-dione; methyl-7 $\alpha$ ,12 $\alpha$ -dihydroxy-5 $\beta$ -cholan-3-oxo-24-oate)                           |                                                    |                                                      | coprostanol                            |                                               |              | lithocholic acid<br>deoxycholic acid<br>chenodeoxycholic acid                                                |
| Shah et al. 2007     | Internal standard and five-point calibration curves; GC-MS measurement in selected ion monitoring                                                                                                                         | cholesterol<br>stigmasterol<br>$\beta$ -sitosterol | 5 $\alpha$ -cholestanol                              | coprostanol<br>5 $\beta$ -stigmastanol | epicoprostanol                                |              |                                                                                                              |
| Tyagi et al., 2007   | Internal standard and eight-point calibration curves; GC-MS measurement in selected ion monitoring                                                                                                                        | cholesterol<br>stigmasterol                        | 5 $\alpha$ -cholestanol<br>5 $\alpha$ -stigmastanol  | coprostanol                            | epicoprostanol                                |              | lithocholic acid<br>deoxycholic acid<br>chenodeoxycholic acid<br>hyodeoxycholic acid<br>ursodeoxycholic acid |

Only compounds were considered that were also used in this study

Studies, in which steroid contents were not presented or not quantified: Evershed et al., 1997; Jardé et al., 2007; Bull et al., 1999; Standley et al., 2000
