# Supplementary material for: Steroid Biomarkers Revisited – Improved Source Identification of Faecal Remains in Archaeological Soil Material
Source: PubMed Central journal article supplement (PMC5217961; doi:10.1371/journal.pone.0164882), 2017-01-06
Supplement: pone.0164882.s028.pdf [file pone.0164882.s028.pdf]

## Supporting Information

### “Steroid Biomarkers Revisited – Improved Source Identification of Faecal Remains in Archaeological Soil Material”

**S2 Table. Studies with quantified faecal steroid contents. Studied animal species and their diet.**

| Reference            | Species*                               | Diet                                                                 |
|----------------------|----------------------------------------|----------------------------------------------------------------------|
| Eneroth et al., 1964 | humans (young men)                     | Omnivore, + corn oil/ + butter                                       |
| Derrien et al., 2011 | cows                                   | grass + corn silage                                                  |
|                      | pigs                                   | wheat + soybean (+ rapeseed)                                         |
|                      | cows                                   | a) grass + hay<br>b) concentrate + silage<br>c) silage + concentrate |
| Gill et al., 2010    | sheep                                  | grass                                                                |
|                      | horses                                 | a) unknown<br>b) grass + hay + concentrates                          |
|                      | pigs                                   | diet unknown                                                         |
| Leeming et al., 1996 | humans                                 | diet unknown                                                         |
|                      | cows                                   | diet unknown                                                         |
|                      | horses                                 | diet unknown                                                         |
|                      | sheep                                  | diet unknown                                                         |
|                      | cows                                   | diet unknown                                                         |
| Isobe et al., 2002   | humans<br>(indian and caucasian woman) | vegetarian and omnivore                                              |
| Shah et al., 2007    | sheep (lambs)                          | diet unknown                                                         |
|                      | cows                                   | diet unknown                                                         |
|                      | pigs                                   | diet unknown                                                         |
|                      | donkeys                                | diet unknown                                                         |
|                      | horses                                 | diet unknown                                                         |
| Tyagi et al., 2007   | humans                                 | diet unknown                                                         |
|                      | cow                                    | diet unknown                                                         |
|                      | pig                                    | diet unknown                                                         |
|                      | horse                                  | diet unknown                                                         |
|                      | chicken                                | diet unknown                                                         |

\*comparable to those investigated in this study
