# Supplementary material for: Steroid Biomarkers Revisited – Improved Source Identification of Faecal Remains in Archaeological Soil Material
Source: PubMed Central journal article supplement (PMC5217961; doi:10.1371/journal.pone.0164882), 2017-01-06
Supplement: pone.0164882.s029.pdf [file pone.0164882.s029.pdf]

## Supporting Information

### “Steroid Biomarkers Revisited – Improved Source Identification of Faecal Remains in Archaeological Soil Material”

**S3 Table. Old livestock breeds: history of the breed, fodder, breeders, and number of samples used for this study.**

| Animal                                  | History                                                                                                                                                                                                                                                                                                                        | Fodder                                | Number of Samples                      | Breeder                                                                                    | References                                     |
|-----------------------------------------|--------------------------------------------------------------------------------------------------------------------------------------------------------------------------------------------------------------------------------------------------------------------------------------------------------------------------------|---------------------------------------|----------------------------------------|--------------------------------------------------------------------------------------------|------------------------------------------------|
| Rotes Höhenvieh (red cattle)            | Breed of red <u>cattle</u> that has kept since several hundred years in the <u>Central Uplands</u> of Germany.                                                                                                                                                                                                                 | grass, leaves, silage                 | faeces from 5 different adult animals  | Arche- und Naturlandhof Büning, Laer, Germany                                              | Sambras, 1999                                  |
| Heck cattle                             | Cattle that was bred back to resemble the aurochs ( <i>Bos primigenius</i> ). For this breeding several domestic cattle breed were used (e.g., the Corsican Cattle, the Highland Cattle, the Hungarian Steppe Cattle).                                                                                                         | grass, leaves                         | faeces from 5 different adult animals  | Nature development area, Oostvaardersplassen, Lelystad, Netherlands                        | Sambras, 2011                                  |
| Konik horse                             | Old Polish horse landrace                                                                                                                                                                                                                                                                                                      | grass, leaves                         | faeces from 5 different adult animals  | Nature development area, Oostvaardersplassen, Lelystad, Netherlands                        | Sambras, 2011                                  |
| Poitou donkey                           | Originally bred in large parts of western France for the production of mules. According to written records the breed already existed in the 10th century.                                                                                                                                                                      | grass                                 | faeces from 1 adult animal (female)    | Poultry and Mangalitza Pig Farm, Lautersheim, Germany                                      | Sambras, 2011,                                 |
| Pomeranian Coarsewool Sheep             | Old domestic sheep breed from the Pomerania and Silesian region (former Germany, now Poland). First bred in Silesia in the 13th century.                                                                                                                                                                                       | grass, hay, leaves, and fallen fruits | faeces from 5 different adult animals  | Private breeder in Erfstadt, Germany                                                       | Sambras, 1999, 2011                            |
| Black Forest Goat and White German Goat | Black forest goat<br>Bred since 1935 in Thuringia (Germany). Originates from local breeds and the Toggenburg goat.<br><br>White German Goat<br>Since the beginning of the 19 <sup>th</sup> century there existed pure white goat breeds. In 1928 they were gathered under the name “White German Goat” and treated as a breed. | grass, herbs, and shrubs              | faeces from 10 different adult animals | Private breeder in Vettweiß-Soller, Germany<br><br>Goats are kept for landscape management | Sambras, 1999; 2011                            |
| German Laying goose                     | The breed originates from white feathered graylag geese. Since 1941 officially bred.                                                                                                                                                                                                                                           | grass                                 | faeces from 5 different adult animals  | Private breeder in Vettweiß-Soller, Germany                                                | GEH e.V., 2014                                 |
| Turopolje Pig                           | Bacon pig that originally comes from Croatia. It was introduced there 1352. Turopolje are uncommonly hardy pigs, able to overwinter outdoors and forage extensively for themselves, being able to survive on a minimal diet.                                                                                                   | fruits and vegetables                 | faeces from 5 different adult animals  | Poultry and Mangalitza Pig Farm, Lautersheim, Germany                                      | Arche Austria, 2014; Grunenfelder et al., 1994 |
| Mangalitza Pig                          | Mangalitzas were developed from the older hardy types of Hungarian pig (Bakonyi and Szalontai breeds) crossed with the European Wild Boar and a Serbian breed (and later others like Alföldi) in Austro-Hungary (1833). 1927 Mangalitzas were officially recognised as a breed.                                                | fruits and vegetables                 | faeces from 5 different adult animals  | Poultry and Mangalitza Pig Farm, Lautersheim, Germany ernährt.                             | Oroian & Petrescu-Mag 2014                     |
