# Supplementary material for: Steroid Biomarkers Revisited – Improved Source Identification of Faecal Remains in Archaeological Soil Material
Source: PubMed Central journal article supplement (PMC5217961; doi:10.1371/journal.pone.0164882), 2017-01-06
Supplement: pone.0164882.s030.pdf [file pone.0164882.s030.pdf]

## Supporting Information

### “Steroid Biomarkers Revisited – Improved Source Identification of Faecal Remains in Archaeological Soil Material”

**S4 Table. Studied compounds, molecular structures, retention times, and selected characteristic ion fragments.**

| Substance                                                         | Trivial name, molecular formula                                                                      | Structure                                                                            | Ret. time (min) | Characteristic ion fragments (m/z) |
|-------------------------------------------------------------------|------------------------------------------------------------------------------------------------------|--------------------------------------------------------------------------------------|-----------------|------------------------------------|
| <b><math>\Delta^5</math>-Sterols</b>                              |                                                                                                      |                                                                                      |                 |                                    |
| Cholest-5-en-3 $\beta$ -ol                                        | Cholesterol <sup>b</sup><br>C <sub>27</sub> H <sub>46</sub> O                                        | 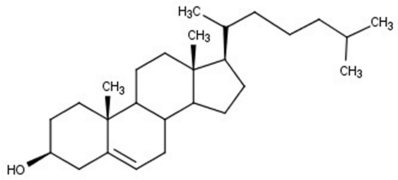   | 41.7            | 329, 368, 458                      |
| 5-Stigmasten-3 $\beta$ -ol,<br>24-Ethyl-5-cholesten-3 $\beta$ -ol | $\beta$ -Sitosterol <sup>b</sup><br>C <sub>29</sub> H <sub>50</sub> O                                |    | 50.5            | 129, 396, 486                      |
| Stigmasta-5,22-dien-3 $\beta$ -ol                                 | Stigmasterol <sup>b</sup><br>C <sub>29</sub> H <sub>48</sub> O                                       |    | 47.8            | 129, 394, 484                      |
| <b>5<math>\alpha</math>-Stanols</b>                               |                                                                                                      |                                                                                      |                 |                                    |
| 5 $\alpha$ -Cholestan-3 $\beta$ -ol                               | 5 $\alpha$ -Cholestanol <sup>b</sup><br>(Dihydrocholesterol)<br>C <sub>27</sub> H <sub>48</sub> O    |  | 42.2            | 445                                |
| 24 $\alpha$ -Ethyl-5 $\alpha$ -cholestan-3 $\beta$ -ol            | 5 $\alpha$ -Stigmasterol <sup>b</sup><br>( $\beta$ -Sitostanol)<br>C <sub>29</sub> H <sub>52</sub> O |  | 51.0            | 215, 383, 473                      |
| <b>5<math>\beta</math>-Stanols</b>                                |                                                                                                      |                                                                                      |                 |                                    |
| 5 $\beta$ -Cholestan-3 $\beta$ -ol                                | Coprostanol <sup>b</sup><br>C <sub>27</sub> H <sub>48</sub> O                                        |  | 38.1            | 215, 257, 355, 370                 |
| 24 $\beta$ -Ethyl-5 $\beta$ -cholestan-3 $\beta$ -ol              | 5 $\beta$ -stigmastanol <sup>a,c</sup><br>(24-Ethylcoprostanol)<br>C <sub>29</sub> H <sub>52</sub> O |  | 46.0            | 215, 257, 383, 398                 |

<sup>a</sup> according to the designation of the National Institute of Standards and Technology (NIST)

<sup>b</sup> obtained from Sigma Aldrich (Taufkirchen, Germany)

<sup>c</sup> obtained from Chiron AS (Trondheim, Norway; supplier: Campro Scientific, Berlin, Germany)

## Supporting Information

### “Steroid Biomarkers Revisited – Improved Source Identification of Faecal Remains in Archaeological Soil Material”

**S4 Table (continuation).** Studied compounds, molecular structures, retention times, and selected characteristic ion fragments.

| Substance                                             | Trivial name,<br>molecular formula                                               | Structure                                                                            | Ret. time<br>(min) | Characteristic ion<br>fragments (m/z) |
|-------------------------------------------------------|----------------------------------------------------------------------------------|--------------------------------------------------------------------------------------|--------------------|---------------------------------------|
| <b>Epi-5<math>\beta</math>-stanols</b>                |                                                                                  |                                                                                      |                    |                                       |
| 5 $\beta$ -Cholestan-3 $\alpha$ -ol                   | Epicoprostanol <sup>b</sup><br>C <sub>27</sub> H <sub>48</sub> O                 | 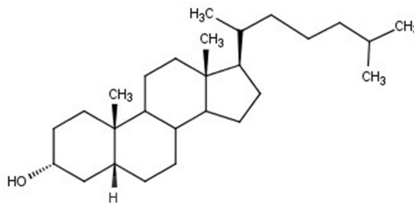   | 38.3               | 215, 257, 355, 370                    |
| 24 $\beta$ -Ethyl-5 $\beta$ -cholestan-3 $\alpha$ -ol | Epi-5 $\beta$ -stigmastanol <sup>c</sup><br>C <sub>29</sub> H <sub>52</sub> O    |    | 46.1               | 215, 257, 383, 398                    |
| <b>Stanones</b>                                       |                                                                                  |                                                                                      |                    |                                       |
| 5 $\alpha$ -Cholestan-3-one                           | Cholestanone <sup>b</sup><br>C <sub>27</sub> H <sub>46</sub> O                   |   | 40.3               | 231, 316, 386                         |
| 5 $\beta$ -Cholestan-3-one                            | Coprostanone <sup>c</sup><br>C <sub>27</sub> H <sub>46</sub> O                   |  | 42.4               | 386                                   |
|                                                       | 4-Cholesten-3-one <sup>b</sup><br>C <sub>27</sub> H <sub>44</sub> O              |  | 38.4               | 124, 229                              |
| 3 $\beta$ -Hydroxy-5 $\alpha$ -cholestan-6-one        | 6-Ketocholestanol <sup>b</sup><br>C <sub>27</sub> H <sub>46</sub> O <sub>2</sub> |  | 46.0               | 445, 459, 474                         |

<sup>b</sup> obtained from Sigma Aldrich (Taufkirchen, Germany)

<sup>c</sup> obtained from Chiron AS (Trondheim, Norway; supplier: Campro Scientific, Berlin, Germany)

## Supporting Information

### “Steroid Biomarkers Revisited – Improved Source Identification of Faecal Remains in Archaeological Soil Material”

**S4 Table (continuation). Studied compounds, molecular structures, retention times, and selected characteristic ion fragments.**

| Substance                                                    | Trivial name, molecular formula                                                               | Structure | Ret. time (min) | Characteristic ion fragments (m/z) |
|--------------------------------------------------------------|-----------------------------------------------------------------------------------------------|-----------|-----------------|------------------------------------|
| <b>Bile acids</b>                                            |                                                                                               |           |                 |                                    |
| 3 $\beta$ -Hydroxy-5 $\beta$ -cholanoic acid                 | Isolithocholic acid <sup>d</sup><br>(ILCA)<br>C <sub>24</sub> H <sub>40</sub> O <sub>3</sub>  |           | 27.2            | 215, 257, 357                      |
| 3 $\alpha$ -Hydroxy-5 $\beta$ -cholanoic acid                | Lithocholic acid <sup>b</sup><br>(LCA)<br>C <sub>24</sub> H <sub>40</sub> O <sub>3</sub>      |           | 27.5            | 215, 257, 372                      |
| 3 $\alpha$ ,12 $\alpha$ -Dihydroxy-5 $\beta$ -cholanoic acid | Deoxycholic acid <sup>b</sup><br>(DCA)<br>C <sub>24</sub> H <sub>40</sub> O <sub>4</sub>      |           | 29.2            | 255, 345, 370                      |
| 3 $\alpha$ ,7 $\alpha$ -Dihydroxy-5 $\beta$ -cholanoic acid  | Chenodeoxycholic acid <sup>b</sup> (CDCA)<br>C <sub>24</sub> H <sub>40</sub> O <sub>4</sub>   |           | 29.8            | 255, 355, 370                      |
| 3 $\alpha$ ,6 $\alpha$ -Dihydroxy-5 $\beta$ -cholanoic acid  | Hyodeoxycholic acid <sup>b</sup><br>(HDCA)<br>C <sub>24</sub> H <sub>40</sub> O <sub>4</sub>  |           | 30.3            | 255, 355, 370                      |
| 3 $\alpha$ ,7 $\beta$ -Dihydroxy-5 $\beta$ -cholanoic acid   | Ursodeoxycholic acid <sup>b</sup><br>(UDCA)<br>C <sub>24</sub> H <sub>40</sub> O <sub>4</sub> |           | 31.0            | 255, 370, 460                      |

<sup>b</sup> obtained from Sigma Aldrich (Taufkirchen, Germany)

<sup>d</sup> obtained from Steraloids (Newport, RI, USA)

## Supporting Information

### “Steroid Biomarkers Revisited – Improved Source Identification of Faecal Remains in Archaeological Soil Material”

**S4 Table (continuation). Studied compounds, molecular structures, retention times, and selected characteristic ion fragments.**

| Substance                                                    | Trivial name, molecular formula                                                                | Structure                                                                            | Ret. time (min)                       | Characteristic ion fragments (m/z) |
|--------------------------------------------------------------|------------------------------------------------------------------------------------------------|--------------------------------------------------------------------------------------|---------------------------------------|------------------------------------|
| <b>Internal standards</b>                                    |                                                                                                |                                                                                      |                                       |                                    |
| 5 $\beta$ -Pregnan-3 $\alpha$ -ol                            | Desoxypregnanolone <sup>d,e</sup><br>C <sub>21</sub> H <sub>36</sub> O                         | 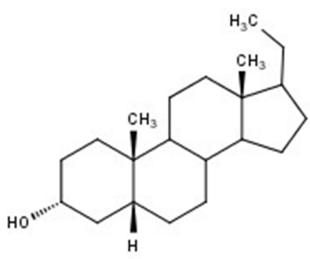    | 23.4                                  | 286, 361                           |
| 5 $\beta$ -Pregnan-3 $\alpha$ -ol-20-one                     | Pregnanolone <sup>d,e</sup><br>C <sub>21</sub> H <sub>34</sub> O <sub>2</sub>                  |     | 27.7                                  | 215, 300, 375                      |
| 7 $\alpha$ ,12 $\alpha$ -Dihydroxy-5 $\beta$ -cholanoic acid | Isodeoxycholic acid <sup>d,e</sup><br>(IDCA)<br>C <sub>24</sub> H <sub>40</sub> O <sub>4</sub> |    | 24.2                                  | 255, 355, 370                      |
|                                                              | 5 $\alpha$ -cholestane <sup>d,f</sup><br>C <sub>27</sub> H <sub>48</sub>                       |  | 31.5 <sup>g</sup> / 20.1 <sup>h</sup> | 217, 357, 372                      |

<sup>d</sup> obtained from Steraloids (Newport, RI, USA)

<sup>e</sup> first internal standard (recovery standard)

<sup>f</sup> second internal standard

<sup>g</sup> measurement of sterols, stanols and stanones

<sup>h</sup> measurement of bile acids
