# Supplementary material for: Steroid Biomarkers Revisited – Improved Source Identification of Faecal Remains in Archaeological Soil Material
Source: PubMed Central journal article supplement (PMC5217961; doi:10.1371/journal.pone.0164882), 2017-01-06
Supplement: pone.0164882.s032.pdf [file pone.0164882.s032.pdf]

## Supporting Information

### “Steroid Biomarkers Revisited – Improved Source Identification of Faecal Remains in Archaeological Soil Material”

**S6 Table. Standard series for calibration (soil)**

| <b>Substance</b><br>$\Delta^5$ -sterols, stanols, and stanones | <b>Amounts spiked to standard series (ng)</b> | <b>Substance</b><br>Bile acids | <b>Amounts spiked to standard series (ng)</b> |
|----------------------------------------------------------------|-----------------------------------------------|--------------------------------|-----------------------------------------------|
| Cholesterol                                                    | 0; 100; 200; 500; 1000                        | Isodeoxycholic acid, IS1       | 0; 100; 200; 500; 1000                        |
| $\beta$ -Sitosterol                                            | 0; 200; 400; 1000; 2000                       | Isolithocholic acid            | 0; 50; 100; 250; 500                          |
| Stigmasterol                                                   | 0; 100; 200; 500; 1000                        | Lithocholic acid               | 0; 100; 200; 500; 1000                        |
| Desoxy pregnanolone, IS1                                       | 0; 100; 200; 500; 1000                        | Deoxycholic acid               | 0; 200; 400; 1000; 2000                       |
| Coprostanol                                                    | 0; 50; 100; 250; 500                          | Chenodeoxycholic acid          | 0; 100; 200; 500; 1000                        |
| 5 $\alpha$ -cholestanol                                        | 0; 50; 100; 250; 500                          | Hyodeoxycholic acid            | 0; 100; 200; 500; 1000                        |
| Epicoprostanol                                                 | 0; 50; 100; 250; 500                          | Ursodeoxycholic acid           | 0; 100; 200; 500; 1000                        |
| 5 $\alpha$ -Stigmastanol                                       | 0; 200; 400; 1000; 2000                       |                                |                                               |
| 5 $\beta$ -Stigmastanol                                        | 0; 100; 200; 500; 1000                        |                                |                                               |
| Epi-5 $\beta$ -Stigmastanol                                    | 0; 50; 100; 250; 500                          |                                |                                               |
| Pregnanolone, IS1                                              | 0; 100; 200; 500; 1000                        |                                |                                               |
| 5 $\alpha$ -cholestan-3-one                                    | 0; 50; 100; 250; 500                          |                                |                                               |
| 5 $\beta$ -cholestan-3-one                                     | 0; 50; 100; 250; 500                          |                                |                                               |
| 6-Ketocholestanol                                              | 0; 100; 200; 500; 1000                        |                                |                                               |
| 4-Cholesten-3-one                                              | 0; 50; 100; 250; 500                          |                                |                                               |
