# Supplementary material for: Steroid Biomarkers Revisited – Improved Source Identification of Faecal Remains in Archaeological Soil Material
Source: PubMed Central journal article supplement (PMC5217961; doi:10.1371/journal.pone.0164882), 2017-01-06
Supplement: pone.0164882.s033.pdf [file pone.0164882.s033.pdf]

## Supporting Information

### “Steroid Biomarkers Revisited – Improved Source Identification of Faecal Remains in Archaeological Soil Material”

**S7 Table. Sterol, stanol, and stanone contents of herbivore faeces (own data and data from literature).**

| <b>Steroid (trivial name)</b>                    | <b>Sheep<sup>1x</sup> (n=1)</b> | <b>Sheep<sup>2a</sup> (n=1)</b> | <b>Sheep<sup>3x</sup> (n=6)</b> | <b>Horse<sup>1x</sup> (n=6)</b> | <b>Horse<sup>2a</sup> (n=1)</b> | <b>Horse<sup>3x</sup> (n=6)</b> | <b>Horse<sup>4x</sup> (n=26)</b> | <b>Donkey<sup>3x</sup> (n=6)</b> |
|--------------------------------------------------|---------------------------------|---------------------------------|---------------------------------|---------------------------------|---------------------------------|---------------------------------|----------------------------------|----------------------------------|
| <b>Δ<sup>5</sup>-Sterols (μg g<sup>-1</sup>)</b> |                                 |                                 |                                 |                                 |                                 |                                 |                                  |                                  |
| Cholesterol                                      | 111 ±11 <sup>†</sup>            | 1754                            | 327 ±88 <sup>†</sup>            | 39 ±9 <sup>†</sup>              | 52                              | 16 ±2 <sup>†</sup>              | 1936 ±149 <sup>†</sup>           | 24 ±3 <sup>†</sup>               |
| Stigmasterol                                     | 22 ±5                           | 109                             | 4 ±0.5                          | 26 ±5                           | 53                              | 15 ±2                           | 1340 ±100                        | 15 ±2                            |
| β-Sitosterol                                     | 196 ±56                         | 1506                            | 22 ±3                           | 218 ±48                         | 505                             | 59 ±8                           | nd                               | 131 ±15                          |
| <b>5β-Stanols (μg g<sup>-1</sup>)</b>            |                                 |                                 |                                 |                                 |                                 |                                 |                                  |                                  |
| Coprostanol                                      | 170 ±27                         | 1917                            | 336 ±58                         | 43 ±6                           | 88                              | 90 ±13                          | 2787 ±275                        | 131 ±16                          |
| 5β-Stigmastanol                                  | 246 ±69                         | 2754                            | 69 ±30                          | 91 ±18                          | 445                             | 51 ±5                           | nd                               | 83 ±10                           |
| <b>Epi-5β-stanols (μg g<sup>-1</sup>)</b>        |                                 |                                 |                                 |                                 |                                 |                                 |                                  |                                  |
| Epicoprostanol                                   | 16 ±3                           | 268                             | 10 ±7                           | 5 ±1                            | 62                              | 22 ±3                           | 2129 ±203                        | 12 ±1                            |
| Epi-5β-stigmastanol                              | 67 ±13                          | 1467                            | nd                              | 0 ±0                            | 303                             | nd                              | nd                               | nd                               |
| <b>5α-Stanols (μg g<sup>-1</sup>)</b>            |                                 |                                 |                                 |                                 |                                 |                                 |                                  |                                  |
| 5α-Cholestanol                                   | 49 ±6                           | 888                             | 42 ±12                          | 25 ±5                           | 56                              | 32 ±2                           | 1791 ±111                        | 20 ±2                            |
| 5α-Stigmastanol                                  | 135 ±28                         | 2304                            | nd                              | 50 ±9                           | 295                             | nd                              | 4932 ±403                        | nd                               |
| <b>Stanones (μg g<sup>-1</sup>)</b>              |                                 |                                 |                                 |                                 |                                 |                                 |                                  |                                  |
| Coprostanone                                     | 17 ±2                           | nd                              | nd                              | 7 ±2                            | nd                              | nd                              | nd                               | nd                               |
| Cholestanone                                     | nd                              | nd                              | nd                              | nd                              | nd                              | nd                              | nd                               | nd                               |
| <b>Ratios</b>                                    |                                 |                                 |                                 |                                 |                                 |                                 |                                  |                                  |
| No. I                                            | 0.79 ✓                          | 0.71 ✓                          | 0.89 ✓                          | 0.66 +/-                        | 0.73 ✓                          | 0.78 ✓                          | 0.73 ✓                           | 0.88 ✓                           |
| No. II                                           | 0.70 +/-                        | 0.65 +/-                        | -                               | 0.65 +/-                        | 0.72 ✓                          | -                               | -                                | -                                |
| No. III                                          | 0.78 ✓                          | 0.68 +/-                        | 0.89 ✓                          | 0.63 +/-                        | 0.61 +/-                        | 0.73 ✓                          | 0.61 +/-                         | 0.86 ✓                           |
| No. IV                                           | -                               | -                               | -                               | -                               | -                               | -                               | -                                | -                                |
| No. V                                            | 41% *<br>(31-53%)               | 41% *                           | 83% *<br>(74-91%)               | 32% ✓<br>(25-40%)               | 17% ✓                           | 64% *<br>(58-69%)               | -                                | 61% *<br>(55-67%)                |
| No. VI                                           | 0.37 ✓<br>(0.2-0.6)             | 0.67 ✓                          | -                               | 0.12 *<br>(0.1-0.2)             | 1.39 ✓                          | -                               | -                                | -                                |

nd = not determined; <sup>†</sup> mean ± standard deviation; <sup>‡</sup> mean ± standard error

We only considered studies, in which steroid contents were presented and quantified (not considered: Bull et al., 1999; Evershed et al., 1997; Jardé et al., 2007; Standley et al., 2000)

Cited studies: 1: Leeming et al., 1996; 2: Gill et al., 2010; 3: Shah et al., 2007 (μg g<sup>-1</sup> wet weight basis); 4: Tyagi et al., 2007; 3: Results from Shah et al. (2007) presented here but excluded from further discussion due to extremely small 5β-stigmastanol contents compared to all other studies

Diet of the studied animals: x = no information provided; a = grass + hay (+concentrates);

#### **Ratios for a detection of faecal matter (and reference):**

No. I: (coprostanol + epicoprostanol) / (5α-cholestanol + coprostanol + epicoprostanol) (Bull et al., 1999);

No. II: (5β-stigmastanol + epi-5β-stigmastanol) / (5α-stigmastanol + 5β-stigmastanol + epi-5β-stigmastanol) (modified from Bull et al., 1999);

No. III: coprostanol / (5α-cholestanol + coprostanol) (Grimalt et al., 1990);

No. IV: coprostanone / (cholestanone + coprostanone) (Grimalt et al., 1990)

Threshold values (Ratios No. I-IV):

>0.7 faecal input confirmed ✓; 0.3-0.7 faecal input can neither be confirmed nor excluded +/-; <0.3 faecal input should be excluded \*

#### **Ratios for a source identification of faecal matter:**

No. V: coprostanol / (coprostanol + 5β-stigmastanol) x 100% (Leeming et al., 1997)

No. VI: epi-5β-stigmastanol / 5β-stigmastanol + epicoprostanol / coprostanol

Threshold values (Ratios No. V-VIII):

No. V: < 38% faeces of herbivores; > 73% human faeces

No. VI: > 1.2 horse faeces; < 0.8 no horse faeces

✓ source identification was possible; \* source identification was not possible.

## Supporting Information

### “Steroid Biomarkers Revisited – Improved Source Identification of Faecal Remains in Archaeological Soil Material”

**S7 Table (continuation). Sterol, stanol, and stanone contents of herbivore faeces (own data and data from literature)**

| Steroid (trivial name)                           | Cow <sup>5b</sup> (n=1) | Cow <sup>1x</sup> (n=6) | Cow <sup>2a</sup> (n=1) | Cow <sup>2b</sup> (n=2) | Cow <sup>3x</sup> (n=6) | Cow <sup>4x</sup> (n=24) | Cow <sup>6x</sup> (n=1) | Cow <sup>7b</sup> (n=6) |
|--------------------------------------------------|-------------------------|-------------------------|-------------------------|-------------------------|-------------------------|--------------------------|-------------------------|-------------------------|
| <b>Δ<sup>5</sup>-Sterols (μg g<sup>-1</sup>)</b> |                         |                         |                         |                         |                         |                          |                         |                         |
| Cholesterol                                      | 262 ±88 <sup>†</sup>    | 201 ±53 <sup>†</sup>    | 155                     | 281 ±66 <sup>†</sup>    | 90 ±54 <sup>†</sup>     | 3774 ±247 <sup>†</sup>   | 223 ±8 <sup>†</sup>     | 8.5                     |
| Stigmasterol                                     | 53 ±21                  | 21 ±7                   | 35                      | 33 ±23                  | 2 ±0.3                  | 490 ±20                  | 66 ±3                   | 4.5                     |
| β-Sitosterol                                     | 263 ±82                 | 187 ±34                 | 360                     | 360 ±7                  | 11 ±0.4                 | nd                       | 196 ±8                  | 8.5                     |
| <b>5β-Stanols (μg g<sup>-1</sup>)</b>            |                         |                         |                         |                         |                         |                          |                         |                         |
| Coprostanol                                      | 252 ±80                 | 213 ±72                 | 132                     | 274 ±15                 | 72 ±38                  | 3658 ±264                | 203 ±9                  | 6                       |
| 5β-Stigmastanol                                  | 1940 ±628               | 184 ±41                 | 821                     | 635 ±32                 | 6 ±1                    | nd                       | nd                      | 9                       |
| <b>Epi-5β-stanols (μg g<sup>-1</sup>)</b>        |                         |                         |                         |                         |                         |                          |                         |                         |
| Epicoprostanol                                   | 97 ±14                  | 15 ±6                   | 15                      | 111 ±1                  | 0.7 ±0.4                | 543 ±54                  | 54 ±2                   | 5                       |
| Epi-5β-stigmastanol                              | 1110 ±223               | 0 ±0                    | 380                     | 747 ±30                 | nd                      | nd                       | nd                      | 20                      |
| <b>5α-Stanols (μg g<sup>-1</sup>)</b>            |                         |                         |                         |                         |                         |                          |                         |                         |
| 5α-Cholestanol                                   | 106 ±23                 | 69 ±24                  | 57                      | 113 ±16                 | 9 ±5                    | 1791 ±111                | 128 ±5                  | 8.5                     |
| 5α-Stigmastanol                                  | 1052 ±150               | 210 ±23                 | 504                     | 212 ±157                | nd                      | 1133 ±65                 | 377 ±19                 | 15                      |
| <b>Stanones (μg g<sup>-1</sup>)</b>              |                         |                         |                         |                         |                         |                          |                         |                         |
| Coprostanone                                     | 54 ±17                  | 19 ±7                   | nd                      | nd                      | nd                      | nd                       | 84 ±3                   | nd                      |
| Cholestanone                                     | 68 ±25                  | nd                      | nd                      | nd                      | nd                      | nd                       | nd                      | nd                      |
| <b>Ratios</b>                                    |                         |                         |                         |                         |                         |                          |                         |                         |
| No. I                                            | 0.77 ✓                  | 0.77 ✓                  | 0.72 ✓                  | 0.77 ✓                  | 0.39 +/-                | 0.70 +/-                 | 0.67 +/-                | 0.55 +/-                |
| No. II                                           | 0.74 ✓                  | 0.47 +/-                | 0.70 +/-                | 0.87 ✓                  | -                       | -                        | -                       | 0.66 +/-                |
| No. III                                          | 0.70 +/-                | 0.76 ✓                  | 0.70 +/-                | 0.71 ✓                  | 0.89 ✓                  | 0.67 +/-                 | 0.61 +/-                | 0.41 +/-                |
| No. IV                                           | 0.44 +/-                | -                       | -                       | -                       | -                       | -                        | -                       | -                       |
| No. V                                            | 11% (6-20%)             | 54% * (39-67%)          | 14%                     | 30% (28-32%)            | 92% * (83-96%)          | -                        | -                       | 40% *                   |
| No. VI                                           | 0.96 * (0.6-1.7)        | 0.07 ✓ (0.03-0.2)       | 0.58 ✓                  | 1.58 * (1.5-1.7)        | -                       | -                        | -                       | 3.1 *                   |

nd = not determined; <sup>†</sup> mean ± standard deviation; <sup>‡</sup> mean ± standard error

We only considered studies, in which steroid contents were presented and quantified (not considered: Bull et al., 1999; Evershed et al., 1997; Jardé et al., 2007; Standley et al., 2000)

Cited studies: 1: Leeming et al., 1996; 2: Gill et al., 2010; 3: Shah et al., 2007 (μg g<sup>-1</sup> wet weight basis); 4: Tyagi et al., 2007; 5: Red cattle (own data, composite sample of n=5); 6: Isobe et al., 2002; 7: Derrien et al., 2011 (only fresh faeces considered)

3: Results from Shah et al. (2007) presented here but excluded from further discussion due to extremely small 5β-stigmastanol contents compared to all other studies

Diet of the studied animals: x = no information provided; a = grass + hay (+ concentrates); b = silage (+ concentrates or + grass)

#### Ratios for a detection of faecal matter (and reference):

- No. I: (coprostanol + epicoprostanol) / (5α-cholestanol + coprostanol + epicoprostanol) (Bull et al., 1999);  
 No. II: (5β-stigmastanol + epi-5β-stigmastanol) / (5α-stigmastanol + 5β-stigmastanol + epi-5β-stigmastanol) (modified from Bull et al., 1999);  
 No. III: coprostanol / (5α-cholestanol + coprostanol) (Grimalt et al., 1990);  
 No. IV: coprostanone / (cholestanone + coprostanone) (Grimalt et al., 1990):

#### Threshold values (Ratios No. I-IV):

>0.7 faecal input confirmed ✓; 0.3-0.7 faecal input can neither be confirmed nor excluded +/-; <0.3 faecal input should be excluded \*

#### Ratios for a source identification of faecal matter:

- No. V: coprostanol / (coprostanol + 5β-stigmastanol) x 100% (Leeming et al., 1997)  
 No. VI: epi-5β-stigmastanol / 5β-stigmastanol + epicoprostanol / coprostanol

#### Threshold values (Ratios No. V-VIII):

- No. V: < 38% faeces of herbivores; > 73% human faeces (Leeming et al., 1997)  
 No. VI: > 1.2 horse faeces; < 0.8 no horse faeces

✓ source identification was possible; \* source identification was not possible.
