# Supplementary material for: Steroid Biomarkers Revisited – Improved Source Identification of Faecal Remains in Archaeological Soil Material
Source: PubMed Central journal article supplement (PMC5217961; doi:10.1371/journal.pone.0164882), 2017-01-06
Supplement: pone.0164882.s034.pdf [file pone.0164882.s034.pdf]

## Supporting Information

### “Steroid Biomarkers Revisited – Improved Source Identification of Faecal Remains in Archaeological Soil Material”

**S8 Table. Sterol, stanol, and stanone contents of omnivore faeces (data from literature)**

| Steroid (trivial name)                           | Chicken <sup>1x</sup><br>(n=6) | Chicken <sup>4x</sup><br>(n=17) | Pig <sup>1x</sup><br>(n=6) | Pig <sup>3x</sup><br>(n=6) | Pig <sup>4x</sup><br>(n=26) | Pig <sup>7c</sup><br>(n=10) |
|--------------------------------------------------|--------------------------------|---------------------------------|----------------------------|----------------------------|-----------------------------|-----------------------------|
| <b>Δ<sup>5</sup>-Sterols (μg g<sup>-1</sup>)</b> |                                |                                 |                            |                            |                             | <b>Sterols (%)</b>          |
| Cholesterol                                      | 219 ±41 <sup>‡</sup>           | 5408 ±785 <sup>‡</sup>          | 127 ±27 <sup>‡</sup>       | 69 ±5 <sup>‡</sup>         | 3606 ±357 <sup>‡</sup>      | 11%                         |
| Stigmasterol                                     | 40 ±7                          | 2872 ±380                       | 0                          | 7 ±1                       | 1710 ±99                    | 2%                          |
| β-Sitosterol                                     | 331 ±17                        | nd                              | 139 ±10                    | 151 ±11                    | nd                          | 13.5%                       |
| <b>5β-Stanols (μg g<sup>-1</sup>)</b>            |                                |                                 |                            |                            |                             | <b>5β-Stanols (%)</b>       |
| Coprostanol                                      | 12 ±7                          | 1971 ±437                       | 353 ±76                    | 530 ±61                    | 8802 ±479                   | 15%                         |
| 5β-Stigmastanol                                  | 58 ±5                          | nd                              | 334 ±45                    | 183 ±33                    | nd                          | 20%                         |
| <b>Epi-5β-stanols (μg g<sup>-1</sup>)</b>        |                                |                                 |                            |                            |                             | <b>Epi-5β-stanols (%)</b>   |
| Epicoprostanol                                   | 1 ±1                           | 62 ±14                          | 25 ±8                      | 88 ±30                     | 1427 ±151                   | 2.5%                        |
| Epi-5β-stigmastanol                              | 0                              | nd                              | 0 ±0                       | nd                         | nd                          | 3%                          |
| <b>5α-Stanols (μg g<sup>-1</sup>)</b>            |                                |                                 |                            |                            |                             | <b>5α-Stanols (%)</b>       |
| 5α-Cholestanol                                   | 12 ±4                          | 287 ±445                        | 45 ±13                     | 63 ±20                     | 1668 ±199                   | 8.5%                        |
| 5α-Stigmastanol                                  | 92 ±10                         | 4685 ±617                       | 127 ±17                    | nd                         | 14329 ±658                  | 10%                         |
| <b>Stanones (μg g<sup>-1</sup>)</b>              |                                |                                 |                            |                            |                             | <b>Stanones (%)</b>         |
| Coprostanone                                     | 3 ±2                           | nd                              | 11 ±4                      | nd                         | nd                          | nd                          |
| Cholestanone                                     | nd                             | nd                              | nd                         | nd                         | nd                          | nd                          |
| <b>Ratios</b>                                    |                                |                                 |                            |                            |                             |                             |
| No. I                                            | 0.52 +/-                       | 0.88 ✓                          | 0.89 ✓                     | 0.91 ✓                     | 0.86 ✓                      | 0.67 +/-                    |
| No. II                                           | 0.39 +/-                       | -                               | 0.72 ✓                     | -                          | -                           | 0.70 +/-                    |
| No. III                                          | 0.50 +/-                       | 0.87 ✓                          | 0.89 ✓                     | 0.89 ✓                     | 0.84 ✓                      | 0.64 +/-                    |
| No. IV                                           | -                              | -                               | -                          | -                          | -                           | -                           |
| No. V                                            | 17% ✓<br>(7-26%)               | -                               | 51%<br>(42-60%)            | 74%<br>(68-80%)            | -                           | 43%                         |
| No. VI                                           | 0.08 ✓<br>(0-0.4)              | -                               | 0.07 ✓<br>(0.04-0.12)      | -                          | -                           | 0.32 ✓                      |

nd = not determined; † mean ± standard deviation; ‡ mean ± standard error

We only considered studies, in which steroid contents were presented and quantified (not considered: Bull et al., 1999; Evershed et al., 1997; Jardé et al., 2007; Standley et al., 2000)

Cited studies: 1: Leeming et al., 1996; 3: Shah et al., 2007 (μg g<sup>-1</sup> wet weight basis); 4: Tyagi et al., 2007; 7: Derrien et al., 2011 (only fresh faeces considered);

3: Results from Shah et al. (2007) presented here but excluded from further discussion due to extremely small 5β-stigmastanol contents compared to all other studies

Diet of the studied animals: x = no information provided; c = wheat, soybean, rapeseed;

#### **Ratios for a detection of faecal matter (and reference):**

No. I: (coprostanol + epicoprostanol) / (5α-cholestanol + coprostanol + epicoprostanol) (Bull et al., 1999);

No. II: (5β-stigmastanol + epi-5β-stigmastanol) / (5α-stigmastanol + 5β-stigmastanol + epi-5β-stigmastanol) (modified from Bull et al., 1999);

No. III: coprostanol / (5α-cholestanol + coprostanol) (Grimalt et al., 1990);

No. IV: coprostanone / (cholestanone + coprostanone) (Grimalt et al., 1990):

#### Threshold values (Ratios No. I-IV):

>0.7 faecal input confirmed ✓; 0.3-0.7 faecal input can neither be confirmed nor excluded +/-; <0.3 faecal input should be excluded \*

#### **Ratios for a source identification of faecal matter:**

No. V: coprostanol / (coprostanol + 5β-stigmastanol) x 100% (Leeming et al., 1997)

No. VI: epi-5β-stigmastanol / 5β-stigmastanol + epicoprostanol / coprostanol

#### Threshold values (Ratios No. V-VIII):

No. V: < 38% faeces of herbivores; > 73% human faeces (Leeming et al., 1997)

No. VI: > 1.2 horse faeces; < 0.8 no horse faeces

✓ source identification was possible; \* source identification was not possible.

## Supporting Information

### “Steroid Biomarkers Revisited – Improved Source Identification of Faecal Remains in Archaeological Soil Material”

**S8 Table (continuation). Sterol, stanol, and stanone contents of omnivore faeces (data from literature)**

| Steroid (trivial name)      | Human <sup>1x</sup><br>(n=6) | Human <sup>3x</sup><br>(n=7) | Human <sup>8d</sup><br>(n=18)                                            | Human <sup>8e</sup><br>(n=22) | Human <sup>8f</sup><br>(n=18) | Human <sup>9g</sup><br>(n=6)                                             | Human <sup>9h</sup><br>(n=6) |  |
|-----------------------------|------------------------------|------------------------------|--------------------------------------------------------------------------|-------------------------------|-------------------------------|--------------------------------------------------------------------------|------------------------------|--|
|                             |                              |                              | <b><math>\Delta^5</math>-Sterols (<math>\mu\text{g g}^{-1}</math>)</b>   |                               |                               | <b>Sterols (<math>\text{mg day}^{-1}</math>)</b>                         |                              |  |
| Cholesterol                 | 290 $\pm$ 26 <sup>†</sup>    | 1201 $\pm$ 574 <sup>‡</sup>  | nd                                                                       | nd                            | nd                            | 79 $\pm$ 49 <sup>†</sup>                                                 | 135 $\pm$ 165 <sup>†</sup>   |  |
| Stigmasterol                | 18 $\pm$ 7                   | 6 $\pm$ 3                    | nd                                                                       | nd                            | nd                            | nd                                                                       | nd                           |  |
| $\beta$ -Sitosterol         | 121 $\pm$ 15                 | 117 $\pm$ 103                | nd                                                                       | nd                            | nd                            | 13 $\pm$ 13                                                              | 70 $\pm$ 77                  |  |
|                             |                              |                              | <b>5<math>\beta</math>-Stanols (<math>\mu\text{g g}^{-1}</math>)</b>     |                               |                               | <b>5<math>\beta</math>-Stanols (<math>\text{mg day}^{-1}</math>)</b>     |                              |  |
| Coprostanol                 | 3432 $\pm$ 636               | 2036 $\pm$ 577               | 20600                                                                    | 7400                          | 9300                          | 420 $\pm$ 138                                                            | 417 $\pm$ 164                |  |
| 5 $\beta$ -Stigmastanol     | 1245 $\pm$ 263               | 15 $\pm$ 4                   | nd                                                                       | nd                            | nd                            | 64 $\pm$ 14                                                              | 205 $\pm$ 93                 |  |
|                             |                              |                              | <b>Epi-5<math>\beta</math>-stanols (<math>\mu\text{g g}^{-1}</math>)</b> |                               |                               | <b>Epi-5<math>\beta</math>-stanols (<math>\text{mg day}^{-1}</math>)</b> |                              |  |
| Epicoprostanol              | 52 $\pm$ 19                  | 0.03 $\pm$ 0.02              | nd                                                                       | nd                            | nd                            | nd                                                                       | nd                           |  |
| Epi-5 $\beta$ -stigmastanol | 0 $\pm$ 0                    | nd                           | nd                                                                       | nd                            | nd                            | nd                                                                       | nd                           |  |
|                             |                              |                              | <b>5<math>\alpha</math>-Stanols (<math>\mu\text{g g}^{-1}</math>)</b>    |                               |                               | <b>5<math>\alpha</math>-Stanols (<math>\text{mg day}^{-1}</math>)</b>    |                              |  |
| 5 $\alpha$ -Cholestanol     | 70 $\pm$ 15                  | 62 $\pm$ 38                  | nd                                                                       | nd                            | nd                            | nd                                                                       | nd                           |  |
| 5 $\alpha$ -Stigmastanol    | 60 $\pm$ 4                   | nd                           | nd                                                                       | nd                            | nd                            | nd                                                                       | nd                           |  |
|                             |                              |                              | <b>Stanones (<math>\mu\text{g g}^{-1}</math>)</b>                        |                               |                               | <b>Stanones (<math>\text{mg day}^{-1}</math>)</b>                        |                              |  |
| Coprostanone                | 29 $\pm$ 6                   | nd                           | nd                                                                       | nd                            | nd                            | 27 $\pm$ 10                                                              | 63 $\pm$ 32                  |  |
| Cholestanone                | nd                           | nd                           | nd                                                                       | nd                            | nd                            | nd                                                                       | nd                           |  |
|                             |                              |                              |                                                                          | <b>Ratio</b>                  |                               |                                                                          |                              |  |
| No. I                       | 0.98 ✓                       | 0.97 ✓                       | -                                                                        | -                             | -                             | -                                                                        | -                            |  |
| No. II                      | 0.95 ✓                       | -                            | -                                                                        | -                             | -                             | -                                                                        | -                            |  |
| No. III                     | 0.98 ✓                       | 0.97 ✓                       | -                                                                        | -                             | -                             | -                                                                        | -                            |  |
| No. IV                      | -                            | -                            | -                                                                        | -                             | -                             | -                                                                        | -                            |  |
| No. V                       | 73% ✓<br>(65-81%)            | 99% ✓<br>(99-10)             | -                                                                        | -                             | -                             | 87% ✓<br>(78-92)                                                         | 67% *<br>(46-84)             |  |
| No. VI                      | 0.02 ✓<br>(0.01-0.03)        | -                            | -                                                                        | -                             | -                             | -                                                                        | -                            |  |

nd = not determined; <sup>†</sup> mean  $\pm$  standard deviation; <sup>‡</sup> mean  $\pm$  standard error

We only considered studies, in which steroid contents were presented and quantified (not considered: Bull et al., 1999; Evershed et al., 1997; Jardé et al., 2007; Standley et al., 2000)

Cited studies: 1: Leeming et al., 1996; 3: Shah et al., 2007 ( $\mu\text{g g}^{-1}$  wet weight basis); 8: Reddy et al., 1998 (only women); 9: Eneroth et al., 1964 (only men)

3: Results from Shah et al. (2007) presented here but excluded from further discussion due to extremely small 5 $\beta$ -stigmastanol contents compared to all other studies

Diet of the studied humans: x = no information provided; d = Caucasian omnivores; e = Indian vegetarians; f = Caucasian vegetarians; g = dietary fat is butter; h = dietary fat is corn oil

#### **Ratios for a detection of faecal matter (and reference):**

No. I: (coprostanol + epicoprostanol) / (5 $\alpha$ -cholestanol + coprostanol + epicoprostanol) (Bull et al., 1999);

No. II: (5 $\beta$ -stigmastanol + epi-5 $\beta$ -stigmastanol) / (5 $\alpha$ -stigmastanol + 5 $\beta$ -stigmastanol + epi-5 $\beta$ -stigmastanol) (modified from Bull et al., 1999);

No. III: coprostanol / (5 $\alpha$ -cholestanol + coprostanol) (Grimalt et al., 1990);

No. IV: coprostanone / (cholestanone + coprostanone) (Grimalt et al., 1990):

#### **Threshold values (Ratios No. I-IV):**

>0.7 faecal input confirmed ✓; 0.3-0.7 faecal input can neither be confirmed nor excluded +/-; <0.3 faecal input should be excluded \*

#### **Ratios for a source identification of faecal matter:**

No. V: coprostanol / (coprostanol + 5 $\beta$ -stigmastanol) x 100% (Leeming et al., 1997)

No. VI: epi-5 $\beta$ -stigmastanol / 5 $\beta$ -stigmastanol + epicoprostanol / coprostanol

#### **Threshold values (Ratios No. V-VIII):**

No. V: < 38% faeces of herbivores; > 73% human faeces (Leeming et al., 1997)

No. VI: > 1.2 horse faeces; < 0.8 no horse faeces

✓ source identification was possible; \* source identification was not possible.
