# Supplementary material for: Steroid Biomarkers Revisited – Improved Source Identification of Faecal Remains in Archaeological Soil Material
Source: PubMed Central journal article supplement (PMC5217961; doi:10.1371/journal.pone.0164882), 2017-01-06
Supplement: pone.0164882.s035.pdf [file pone.0164882.s035.pdf]

## Supporting Information

### “Steroid Biomarkers Revisited – Improved Source Identification of Faecal Remains in Archaeological Soil Material”

**S9 Table. Bile acid contents of omnivore and herbivore faeces (own data and data from literature)**

| <b>Steroid<br/>(trivial name)</b> | <b>Horse<sup>4x</sup><br/>(n=26)</b> | <b>Cow<sup>5b</sup><br/>(n=1)</b> | <b>Cow<sup>4x</sup><br/>(n=24)</b> | <b>Chicken<sup>4x</sup><br/>(n=17)</b> | <b>Pig<sup>4x</sup><br/>(n=26)</b> | <b>Human<sup>8d</sup><br/>(n=18)</b> | <b>Human<sup>8e</sup><br/>(n=22)</b> | <b>Human<sup>8f</sup><br/>(n=18)</b> | <b>Human<sup>10x</sup><br/>(n=6)</b> | <b>Human<sup>10x</sup><br/>(n=6)</b> |
|-----------------------------------|--------------------------------------|-----------------------------------|------------------------------------|----------------------------------------|------------------------------------|--------------------------------------|--------------------------------------|--------------------------------------|--------------------------------------|--------------------------------------|
| Isoalloxycholic acid (IDCA)       | nd                                   | 0                                 | nd                                 | nd                                     | nd                                 | nd                                   | nd                                   | nd                                   | 500 ±50 <sup>§</sup>                 | 400 ±100 <sup>§</sup>                |
| Isolithocholic acid (ILCA)        | nd                                   | 2.4 ±0.1 <sup>†</sup>             | nd                                 | nd                                     | nd                                 | nd                                   | nd                                   | nd                                   | nd                                   | nd                                   |
| Lithocholic acid (LCA)            | 660 ±71 <sup>‡</sup>                 | 25 ±0.4                           | 430 ±36 <sup>‡</sup>               | 203 ±27 <sup>‡</sup>                   | 6337 ±1661 <sup>‡</sup>            | 2900 ±700 <sup>†</sup>               | 1720 ±500 <sup>†</sup>               | 1630 ±400 <sup>†</sup>               | 1800 ±100                            | 1200 ±300 <sup>§</sup>               |
| Deoxycholic acid (DCA)            | 854 ±110                             | 171 ±21                           | 2888 ±444                          | 96 ±12                                 | 129 ±17                            | 3210 ±900                            | 2540 ±600                            | 2070 ±900                            | 3500 ±200                            | 2900 ±400                            |
| Chenodeoxycholic acid (CDCA)      | 518 ±50                              | 0                                 | 0                                  | 6638 ±926                              | 1507 ±204                          | 190 ±400                             | 400 ±350                             | 60 ±80                               | uql                                  | uql                                  |
| Hyodeoxycholic acid (HDCA)        | 0                                    | 0                                 | 0                                  | 0                                      | 30501 ±4153                        | nd                                   | nd                                   | nd                                   | nd                                   | nd                                   |
| Ursodeoxycholic acid (UDCA)       | 0                                    | 0                                 | 0                                  | 560 ±126                               | 532 ±108                           | nd                                   | nd                                   | nd                                   | uql                                  | uql                                  |
| <b>Ratio</b>                      |                                      |                                   |                                    |                                        |                                    |                                      |                                      |                                      |                                      |                                      |
| DCA / LCA                         | 1.3 (1.0-1.6)                        | 6.9 (5.9-7.9)                     | 6.7 (5.2-8.5)                      | 0.5 (0.4-0.7)                          | 0.02 (0.01-0.03)                   | 1.1 (0.6-1.9)                        | 1.5 (0.9-2.5)                        | 1.3 (0.6-2.4)                        | 1.9 (1.7-2.2)                        | 2.4 (1.7-3.7)                        |
| DCA / CDCA                        | 1.6 (1.3-2.1)                        | -                                 | -                                  | 0.01 (0.01-0.02)                       | 0.09 (0.07-0.11)                   | 17                                   | 6.4 (3-63)                           | 35                                   | -                                    | -                                    |
| CDCA / LCA                        | 0.8 (0.6-1.0)                        | -                                 | -                                  | 32 (25-43)                             | 0.2 (0.2-0.4)                      | 0.07 (0.00-0.3)                      | 0.2 (0.02-0.6)                       | 0.04 (0-0.1)                         | -                                    | -                                    |

nd = not determined; <sup>†</sup> mean ± standard deviation; <sup>‡</sup> mean ± standard error; <sup>§</sup> mean ± standard error or standard deviation (no information provided)

Cited studies: 4: Tyagi et al., 2007; 5: Red cattle (own data, composite sample of n=5); 8: Reddy et al., 1998 (only women); Batta et al., 2002 (use of different derivatization agents)

Diet: x = no information provided; b = silage (+ concentrates or + grass); d = Caucasian omnivores; e = Indian vegetarians; f = Caucasian vegetarians
