# Supplementary material for: Steroid Biomarkers Revisited – Improved Source Identification of Faecal Remains in Archaeological Soil Material
Source: PubMed Central journal article supplement (PMC5217961; doi:10.1371/journal.pone.0164882), 2017-01-06
Supplement: pone.0164882.s036.pdf [file pone.0164882.s036.pdf]

## Supporting Information

### “Steroid Biomarkers Revisited – Improved Source Identification of Faecal Remains in Archaeological Soil Material”

**S10 Table. Further steroid ratios for source identification of a faecal input applied on steroid contents of faecal samples from this study.**

| No. | Ratio <sup>†</sup>                                                                              | Heck cattle | Sheep  | Goats  | Horses | Donkey | Geese  | Pigs   | Humans  | Ref.                  |
|-----|-------------------------------------------------------------------------------------------------|-------------|--------|--------|--------|--------|--------|--------|---------|-----------------------|
| I   | (coprostanol + epicoprostanol) /<br>(5 $\beta$ -stigmastanol + epi-5 $\beta$ -<br>stigmastanol) | 0.11 ✓      | 0.16 ✓ | 0.07 ✓ | 0.11 ✓ | 0.15 ✓ | 0.20 ✓ | 0.51 * | 2.22 ✓  | Shillito et al., 2011 |
| II  | (coprostanol + 5 $\beta$ -stigmastanol) /<br>(cholesterol + $\beta$ -sitosterol)                | 4.6 *       | 4.7 *  | 1.2 *  | 1.7 *  | 3.3 *  | 0.4    | 8.7    | 2.2 *   | Leeming et al., 1996  |
| III | epicoprostanol /<br>(coprostanol + 5 $\alpha$ -cholestanol)                                     | 0.10 *      | 0.10   | 0.07   | 1.04 ✓ | 0.17   | 0.05   | 0.05   | 0.012 * | Standley et al., 2000 |

All ratios were calculated from the means of n = 3 laboratory replicates, except for the pigs (ratios were calculated from the means of the faecal steroid contents of Turopolje and Mangaliza pigs, n = 2 real replicates with each n = 3 laboratory replicates), range in parentheses.

† Threshold values and interpretation:

No. I: > 1 = omnivore (i.e. human or pig)

No. II: 1 = cows and horses, 1-3 = sheep

No. III: < 0.01 human faeces; > 0.1 cattle and horses

✓ source identification was possible

\* source identification was not possible
