# Supplementary material for: Steroid Biomarkers Revisited – Improved Source Identification of Faecal Remains in Archaeological Soil Material
Source: PubMed Central journal article supplement (PMC5217961; doi:10.1371/journal.pone.0164882), 2017-01-06
Supplement: pone.0164882.s037.pdf [file pone.0164882.s037.pdf]

## Supporting Information

### “Steroid Biomarkers Revisited – Improved Source Identification of Faecal Remains in Archaeological Soil Material”

**S11 Table. Sterol, stanol, and stanone contents of archaeological soil samples.**

| Steroid group<br>Sample                   | $\Delta^5$ -Sterols |                     | 5 $\beta$ -stanols |                | Epi-5 $\beta$ -stanols   |                | 5 $\alpha$ -stanols         |                         | 5 $\beta$ -stanone        | 5 $\alpha$ -stanone | $\Sigma$ sterols, stanols, stanones<br>( $\mu\text{g kg}^{-1}$ soil) |              |
|-------------------------------------------|---------------------|---------------------|--------------------|----------------|--------------------------|----------------|-----------------------------|-------------------------|---------------------------|---------------------|----------------------------------------------------------------------|--------------|
|                                           | Cholesterol         | $\beta$ -Sitosterol | Stigma-sterol      | Coprostanol    | 5 $\beta$ -Stigma-stanol | Epicoprostanol | Epi-5 $\beta$ -stigmastanol | 5 $\alpha$ -Cholestanol | 5 $\alpha$ -Stigma-stanol | Coprostanone        |                                                                      | Cholestanone |
| ( $\mu\text{g kg}^{-1}$ soil)             |                     |                     |                    |                |                          |                |                             |                         |                           |                     |                                                                      |              |
| <b>Dormagen</b>                           |                     |                     |                    |                |                          |                |                             |                         |                           |                     |                                                                      |              |
| Cesspit                                   | 26.0 $\pm$ 0.9      | 44.7 $\pm$ 2.2      | 16.2 $\pm$ 1.4     | 22.4 $\pm$ 0.4 | 26.5 $\pm$ 1.7           | 5.0 $\pm$ 0.3  | 9.6 $\pm$ 1.2               | 20.7 $\pm$ 0.7          | 60.7 $\pm$ 4.4            | 4.0 $\pm$ 0.2       | 11.4 $\pm$ 0.3                                                       | 247          |
| Stable drain (brown filling) <sup>a</sup> | 58.0                | 86.7                | 0.0                | 10.0           | 24.8                     | 7.2            | 25.3                        | 36.4                    | 94.1                      | 5.1                 | 0                                                                    | 348          |
| Stable drain (green filling)              | 36.5 $\pm$ 1.8      | 25.3 $\pm$ 0.8      | 5.6 $\pm$ 0.3      | 4.1 $\pm$ 1.7  | 6.3 $\pm$ 4.1            | 2.9 $\pm$ 0.6  | 5.0 $\pm$ 1.4               | 20.0 $\pm$ 2.8          | 65.3 $\pm$ 4.4            | 2.7 $\pm$ 0.8       | 0 $\pm$ 0                                                            | 174          |
| Stable area                               | 2.1 $\pm$ 2.0       | 12.4 $\pm$ 9.4      | 2.2 $\pm$ 1.4      | uql            | 3.6 $\pm$ 1.7            | 0 $\pm$ 0.0    | uql                         | uql                     | 29.6 $\pm$ 27.0           | 0 $\pm$ 0           | 5.5 $\pm$ 4.9                                                        | 55           |
| Control                                   | 7.4 $\pm$ 5.8       | 40.4 $\pm$ 5.9      | 16.5 $\pm$ 2.6     | uql            | 6.8 $\pm$ 1.0            | uql            | 2.2 $\pm$ 0.2               | 2.0 $\pm$ 1.5           | 56.4 $\pm$ 7.7            | 0 $\pm$ 0           | 3.9 $\pm$ 3.6                                                        | 136          |
| <b>Inden</b>                              |                     |                     |                    |                |                          |                |                             |                         |                           |                     |                                                                      |              |
| Sewer ditch (70cm) <sup>a</sup>           | 62.5                | 42.1                | 7.2                | 13.6           | 34.5                     | 2.6            | 10.4                        | 21.2                    | 75.7                      | uql                 | 31.4                                                                 | 304          |
| Sewer ditch (80cm)                        | 109 $\pm$ 49        | 101 $\pm$ 13        | 8.5 $\pm$ 12.0     | 20.3 $\pm$ 0.2 | 91.6 $\pm$ 26.4          | 14.4 $\pm$ 1.7 | 64.6 $\pm$ 6.3              | 80.7 $\pm$ 33.2         | 126 $\pm$ 6.7             | 0 $\pm$ 0           | 12.2 $\pm$ 17.3                                                      | 631          |
| Control*                                  | 21.4                | 7.9                 | 0                  | 0              | 4.6                      | 0              | 4.1                         | 0                       | 50.0                      | 0                   | 16.1                                                                 | 104          |
| <b>Düren-Arnoldsweiler</b>                |                     |                     |                    |                |                          |                |                             |                         |                           |                     |                                                                      |              |
| LBK well <sup>a</sup>                     | 6.8                 | 60.3                | 8.1                | 14.6           | 21.8                     | 2.4            | 5.5                         | 2.1                     | 61.4                      | 0                   | 62.0                                                                 | 245          |
| Bronze Age well <sup>a</sup>              | 62.7                | 376                 | 79.9               | 25.1           | 184                      | 52.8           | 147                         | 33.7                    | 242                       | 0                   | 16.3                                                                 | 1219         |
| Iron Age well <sup>a</sup>                | 215                 | 1468                | 188                | 144            | 197                      | 50.5           | 136                         | 337                     | 1533                      | 0                   | 6.5                                                                  | 4275         |

All values are means  $\pm$  standard deviation; <sup>a</sup> only one replicate considered (due to low recoveries for the other replicates);

uql = under quantification limit
