# Supplementary material for: Steroid Biomarkers Revisited – Improved Source Identification of Faecal Remains in Archaeological Soil Material
Source: PubMed Central journal article supplement (PMC5217961; doi:10.1371/journal.pone.0164882), 2017-01-06
Supplement: pone.0164882.s038.pdf [file pone.0164882.s038.pdf]

## Supporting Information

### “Steroid Biomarkers Revisited – Improved Source Identification of Faecal Remains in Archaeological Soil Material”

**S12 Table. Bile acid contents of archaeological soil samples.**

| Steroid group<br>Sample      | CDCA       | DCA      | HDCA       | Bile Acids |            |           | 1 <sup>st</sup> internal Std <sup>b</sup><br>IDCA | Σ Bile Acids<br>(µg kg <sup>-1</sup> soil) |
|------------------------------|------------|----------|------------|------------|------------|-----------|---------------------------------------------------|--------------------------------------------|
|                              |            |          |            | ILCA       | LCA        | UDCA      |                                                   |                                            |
| (µg kg <sup>-1</sup> soil)   |            |          |            |            |            |           |                                                   |                                            |
| <b>Dormagen</b>              |            |          |            |            |            |           |                                                   |                                            |
| Cesspit <sup>a</sup>         | 93.4       | 769      | 316        | uql        | 69.5       | 13.7      | 0                                                 | 1262                                       |
| Stable drain (brown filling) | 81.8 ±1.8  | 450 ±57  | 104 ±15    | uql        | 88.6 ±0.4  | 6.2 ±0.2  | 0                                                 | 780                                        |
| Stable drain (green filling) | 20.8 ±3.9  | 192 ±29  | 89.5 ±56.8 | 0 ±0       | 20.7 ±7.9  | uql       | 0                                                 | 326                                        |
| Stable area                  | 23.4 ±1.2  | 213 ±40  | 41.4 ±20.3 | 0 ±0       | 31.6 ±2.5  | uql       | 0                                                 | 312                                        |
| Control                      | 12.6 ±1.8  | 119 ±11  | 46.7 ±4.9  | 0 ±0       | 13.3 ±0.8  | 0 ±0      | 0                                                 | 191                                        |
| <b>Inden</b>                 |            |          |            |            |            |           |                                                   |                                            |
| Sewer ditch (70cm)           | 26.2 ±7.7  | 291 ±83  | 390 ±15    | uql        | 28.0 ±10.2 | 13.1 ±0.7 | 0                                                 | 749                                        |
| Sewer ditch (80cm)           | 52.8 ±30.2 | 235 ±152 | 118 ±63    | 5.1 ±2.3   | 139 ±31    | 9.1 ±5.7  | 0                                                 | 560                                        |
| Control <sup>a</sup>         | 10.1       | 32.2     | 26.4       | 0          | 2.5        | 0         | 0                                                 | 71                                         |
| <b>Düren-Arnoldsweiler</b>   |            |          |            |            |            |           |                                                   |                                            |
| LBK well                     | 18.6 ±0    | 701 ±97  | 1021 ±216  | 13.9 ±5.7  | 118 ±22.4  | 7.9 ±1.8  | 0                                                 | 1879                                       |
| Bronze Age well              | 21.4 ±3.1  | 513 ±26  | 411 ±189   | uql        | 36.5 ±4.8  | 0 ±0      | 0                                                 | 985                                        |
| Iron Age well                | 6.4 ±0.9   | 1306 ±39 | 237 ±114   | uql        | 208 ±55    | 0 ±0      | 0                                                 | 1758                                       |

All values are means ± standard deviation; <sup>a</sup> only one replicate considered (due to low recoveries for the other replicates); <sup>b</sup> quantification by standard addition to the matrix sample;

uql = under quantification limit;

CDCA = chenodeoxycholic acid, DCA = deoxycholic acid, HDCA = hyodeoxycholic acid, ILCA = isolithocholic acid, LCA = lithocholic acid, UDCA = ursodeoxycholic acid, IDCA = isodeoxycholic acid
